# Supplementary material
Source: PubMed Central journal article supplement (PMC356992)

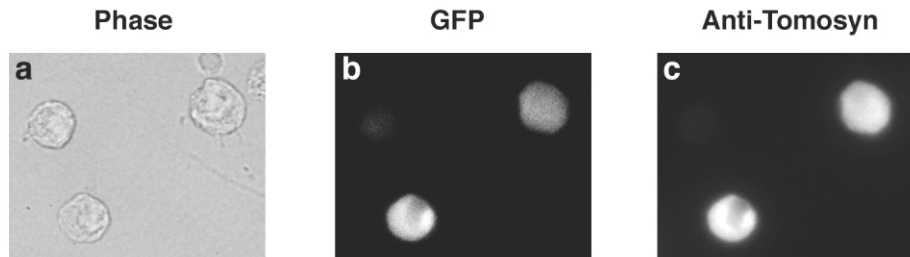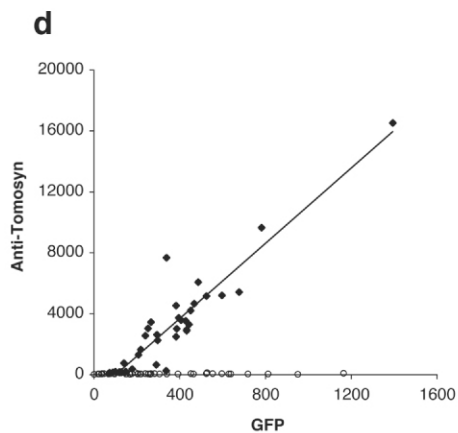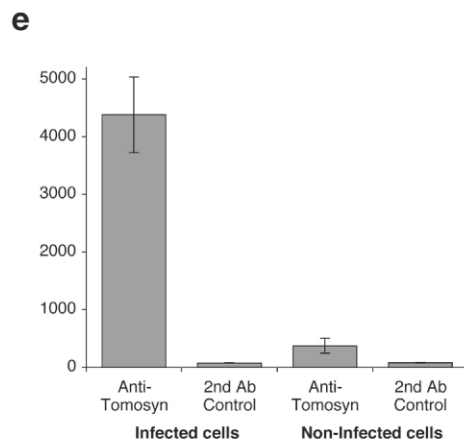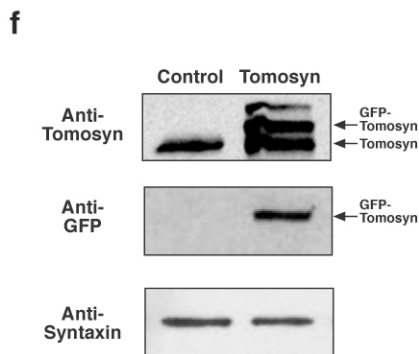

Supplement: pnas_0308700100_3.pdf [file pnas_0308700100_3.pdf]
